1 **Assessing the remarkable morphological diversity and transcriptomic basis of leaf shape in**  
2 ***Ipomoea batatas* (sweetpotato)**

3

4 Sonal Gupta<sup>1</sup>, David M. Rosenthal<sup>2</sup>, John R. Stinchcombe<sup>3</sup>, Regina S. Baucom<sup>1</sup>

5

6 <sup>1</sup>Ecology and Evolutionary Biology Department, University of Michigan, Ann Arbor, MI

7 <sup>2</sup>Department of Environmental and Plant Biology, Ohio University, Athens, Ohio.

8 <sup>3</sup>Department of Ecology and Evolutionary Biology, University of Toronto, Toronto, ON, Canada

9

|                                                                      |      |                                     |                                        |
|----------------------------------------------------------------------|------|-------------------------------------|----------------------------------------|
| <b>Total word count</b> (excluding summary, references, and legends) | 6211 | No. of figures                      | 6 (Figs 3, 4, 5 and 6 in color)        |
| Summary                                                              | 200  | No. of tables                       | 5                                      |
| Introduction                                                         | 1153 | No. of Supporting information files | 7 (Method S1; Fig. S1-S3; Table S1-S3) |
| Methods                                                              | 1346 |                                     |                                        |
| Results                                                              | 1711 |                                     |                                        |
| Discussion                                                           | 1997 |                                     |                                        |
| Acknowledgements                                                     | 93   |                                     |                                        |

10

11

12

13

14

15

16

17

18

19

20

21 **Abstract:**

- 22 • Leaf shape, a spectacularly diverse plant trait, varies across taxonomic levels, geography,  
23 and in response to environmental differences. However, comprehensive intraspecific  
24 analyses of leaf shape variation across variable environments is surprisingly absent. Here,  
25 we perform a multi-level analysis of leaf shape using diverse accessions of sweetpotato  
26 (*Ipomoea batatas*), and uncover the role of genetics, environment, and GxE on this  
27 important trait.
- 28 • We examine leaf shape using a variety of morphometric analyses, and complement this  
29 with a transcriptomic survey to identify gene expression changes associated with shape  
30 variation. Additionally, we examine the role of genetics and environment on leaf shape  
31 by performing field studies in two geographically separate common gardens.
- 32 • We show that extensive leaf shape variation exists within *I. batatas*, and identify  
33 promising candidate genes underlying this variation. Interestingly, when considering  
34 traditional measures, we find that genetic factors are largely responsible for most of leaf  
35 shape variation, but that the environment is highly influential when using more  
36 quantitative measures *via* leaf outlines.
- 37 • This extensive and multi-level examination of leaf shape shows an important role of  
38 genetics underlying a potentially important agronomic trait, and highlights that the  
39 environment can be a strong influence when using more quantitative measures of leaf  
40 shape.

41  
42 **Keywords:**

43 Digital morphometrics, EFD, GxE, genetic architecture, leaf shape, sweetpotato, transcriptomics

44  
45  
46  
47  
48  
49  
50  
51  
52  
53  
54  
55

## 56 INTRODUCTION

57 Leaf shape varies spectacularly among plant species at multiple taxonomic levels (Klein *et al.*,  
58 2017; Shi *et al.*, 2019), across geography (Wyatt & Antonovics, 1981; Gurevitch, 1988), and in  
59 response to environmental differences (Andersson, 1991; Jones, 1995; McDonald *et al.*, 2003).  
60 Leaves can vary with respect to their degree of dissection, length-to-width ratio, venation  
61 patterning, prominence of tips and petiolar sinus, or any combinations of the above, meaning that  
62 leaf shape variation across species is multifaceted and complex. Leaf shape diversity is also  
63 present within species (Hilu, 1983). For example, accessions of grapevine and cotton vary with  
64 respect to leaf complexity whereas lineages within tomato and apple show ample variation in the  
65 length-to-width ratio of leaves (Chitwood *et al.*, 2013; Andres *et al.*, 2016; Klein *et al.*, 2017;  
66 Migicovsky *et al.*, 2017). Although a large number of species exhibit variation in leaf shape,  
67 examinations within species are often limited to only a few accessions, with a few notable  
68 exceptions (Conesa *et al.*, 2012; Chitwood *et al.*, 2014a, b). Moreover, these studies often focus  
69 on circularity and length-to-width ratio, which are the most common leaf shape descriptors.  
70 Thus, for most species, truly quantitative analyses of the diversity of leaf shape variation within  
71 species remains largely unexamined.

72 Leaf shape variation is regulated by genetics, the environment, and the interaction of  
73 genes and environment (GxE). Although the genetic and transcriptomic basis underlying leaf  
74 shape diversity has been uncovered in only a small number of species (*i.e.*, tomato, Arabidopsis,  
75 cotton, and a few others; Kim *et al.*, 2002; Kimura *et al.*, 2008; Vlad *et al.*, 2014; Ichihashi *et al.*,  
76 2014; Andres *et al.*, 2016; Chitwood & Sinha, 2016), there are many examples showing the  
77 influence of different environments on leaf shape (McDonald *et al.*, 2003; Zwieniecki *et al.*,  
78 2004; Hopkins *et al.*, 2008; Royer *et al.*, 2009; Nicotra *et al.*, 2011; Royer, 2012; Campitelli &  
79 Stinchcombe, 2013; Glennon & Cron, 2015). For example, submerged leaves of aquatic plants  
80 are often highly dissected as compared to their aerial counterparts (Arber, 2010) and leaves  
81 growing in colder environments tend to be more complex than similar ones growing in warmer  
82 environments (Huff *et al.*, 2003; Royer *et al.*, 2005). Moreover, the environment can interact  
83 with genes to further modulate leaf shape. For instance, Nakayama and colleagues (2014) found  
84 that changes in temperature leads to abrupt changes in KNOX1 (*KNOTTED1-LIKE*  
85 *HOMEOBOX1*) activity, a key regulator of circularity in multiple species, thus altering leaf  
86 complexity. Although we are beginning to understand how genetics, environment, and GxE  
87 separately influence aspects of leaf shape, few studies have partitioned the effect of genetics  
88 versus the environment on leaf shape variation, and most examinations are limited to only one  
89 environment, such that the role of GxE on leaf shape is often not considered within species.

90 Leaf shape is most commonly quantified using the ‘traditional’ leaf shape traits --  
91 circularity (a measure of leaf dissection, or ‘lobedness’), aspect ratio (the length-to-width ratio of  
92 a leaf) and solidity (the relation of the area and convex hull). These traditional morphometric  
93 parameters have previously been used to quantify leaf shape in diverse species, such as grapes  
94 (Chitwood *et al.*, 2014b), tomato (Chitwood *et al.*, 2015) and sweetpotato (Rosero *et al.*, 2019),  
95 among others. Although these traits are linked to important yield traits in crops (Chitwood *et al.*,  
96 2013; Vuolo *et al.*, 2016; Chitwood & Otoni, 2017; Klein *et al.*, 2017; Rowland *et al.*, 2019), and  
97 are important for understanding the broader aspects of plant adaptation to environment, they  
98 capture only a few components of leaf shape variation. A more comprehensive quantification of  
99 leaf shape can be captured with Elliptical Fourier Descriptor (EFD) analyses, which converts leaf

100 outlines to harmonic coefficients allowing for Fourier analyses (Chitwood & Sinha, 2016). This  
101 approach captures extensive leaf shape variation due to both symmetry and asymmetry of the  
102 leaf; some examples include shape differences associated with the depth of the petiolar sinus, the  
103 prominence of the leaf tip, and the positioning of the lobes. This approach has been applied to a  
104 handful of species like tomatoes, passiflora, and grape (Chitwood *et al.*, 2013; Chitwood &  
105 Otoni, 2017; Klein *et al.*, 2017), where it was shown that leaf shape based on EFD analysis is  
106 highly heritable. Thus, traditional measures along with consideration of leaf outlines holds  
107 greater power to comprehensively measure and characterize leaf shape, which may yield  
108 important insights about the genetic basis of leaf shape variation. Interestingly, while leaf shape  
109 based on EFD analysis is heritable, no studies have yet examined the genetic or transcriptomic  
110 basis of leaf shape based on leaf outlines.

111 *Ipomoea batatas*, the sweetpotato, is an important staple root crop worldwide (Khoury *et al.*  
112 *et al.*, 2015), as it produces the highest amount of edible energy per hectare (Khoury *et al.*, 2015)  
113 and also provides an important source of nutrients in the form of vitamin A, calcium, and iron  
114 (Kays & Kays, 1998). Sweetpotato displays striking morphological variation in leaf shape across  
115 its ~6000 documented varieties (Huaman, 1987), but very few studies have examined the  
116 extensive leaf shape diversity in this species (Huaman, 1987; Hue *et al.*, 2012; Rosero *et al.*,  
117 2019). Studies that have examined leaf shape phenotypes in sweetpotato are limited to a few  
118 cultivars and/or present traditional measures of leaf shape traits. Additionally, the genetic or  
119 transcriptomic basis of leaf shape variation in this species has yet to be considered. The vast  
120 unexamined diversity of leaf shape in this species, along with its role as a staple food crop  
121 worldwide makes *I. batatas* an ideal study system to investigate leaf shape diversity at the  
122 species level and how this diversity is influenced by the interplay between genetics and  
123 environment.

124 Here, we examine the extensive leaf shape variation within accessions of *I. batatas*, and  
125 uncover the role of genetics, environment and GxE in influencing leaf shape traits. We  
126 specifically ask: (1) How diverse is leaf shape at a species-wide level? (2) what are the candidate  
127 genes associated with leaf shape (extending beyond the traditional shape descriptors)? and (3) to  
128 what degree does the environment and GxE influence leaf shape traits? We show that extensive  
129 natural variation exists in leaf shape within this species and that most of this variation is largely  
130 controlled by genetic factors, with a low proportion of variance in leaf shape attributable to  
131 environmental differences. We also identified promising candidate genes that underlie broad  
132 differences in multiple leaf shape traits. The results of our work fill critical gaps in current  
133 knowledge of leaf shape evolution by expanding analysis beyond that of the traditional measures  
134 of leaf shape and by using many distinct lineages of the species. We unite this with the  
135 transcriptomic basis of these traits along with a multiple-environment assessment of leaf shape  
136 variation in the field. Thus, this work allows us to comprehensively assess leaf shape in this  
137 agronomically important species and partition the role of genetics, environment, and GxE on leaf  
138 shape within this species.

## 139 **METHODS**

### 140 **Leaf shape variation within *I. batatas***

141 We ordered vegetative slips for 68 publicly available accessions of sweetpotato from  
142 USDA and online resources. The location of origin of 68 accessions is represented in Fig. 1

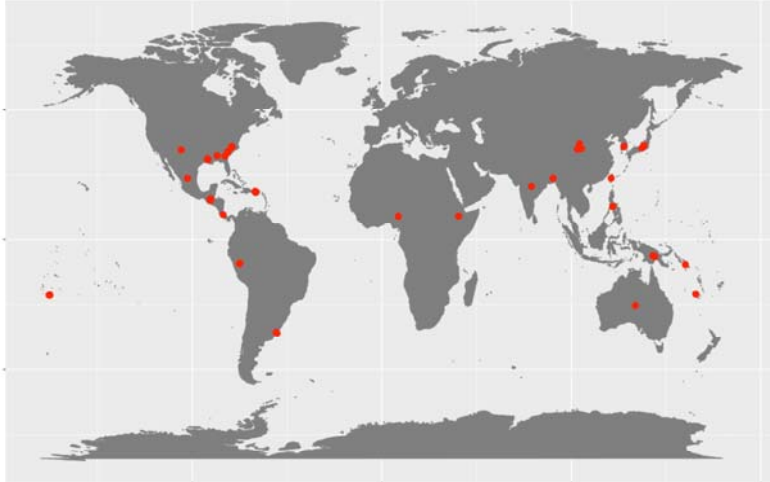

**Figure 1.** Geographic diversity of the 74 chosen sweetpotato, *Ipomoea batatas*, accessions. Red dots represent the origin of the chosen samples.

158

159 exposure to light) of 57 randomly chosen accessions and scanned them for leaf shape analyses.

160 We used the scanned images to extract leaf shape trait values using custom macros in  
161 ImageJ (Abràmoff *et al.*, 2004). Briefly, we converted leaves into binary images and then used  
162 outlines from these binary images to measure circularity, aspect ratio and solidity, each capturing  
163 a distinct aspect of leaf shape (Li *et al.*, 2018). Circularity, measured as  $4\pi \frac{area}{perimeter^2}$ , is  
164 influenced by serrations and lobing. Aspect ratio, in comparison, is measured as the ratio of the  
165 major axis to the minor axis of the best fitted ellipse, and is influenced by leaf length and width.  
166 Lastly, solidity measured as  $\frac{area}{convex\ hull}$ , is sensitive to leaves with deep lobes, or with a distinct  
167 petiole, and can be used to distinguish leaves lacking such structures. Solidity, unlike circularity,  
168 is not very sensitive to serrations and minor lobings, since the convex hull remains largely  
169 unaffected.

170 For a more global analysis of leaf shape via Elliptical Fourier Descriptor (EFDs), we used  
171 the program SHAPE (Iwata & Ukai, 2002) as described in (Chitwood *et al.*, 2014b). EFDs  
172 capture variation in shape represented by the outline which is difficult to categorize via  
173 traditional shape descriptors. From the EFD coefficients obtained, we used coefficients a and d  
174 only, thus analyzing symmetric variation in leaf shape. Principal component analysis (PCA) was  
175 performed on the EFD coefficients to identify shape features contributing to leaf morphological  
176 variation (referred to as EFD symPCs below). We calculated the correlation matrices using the  
177 rcorr() function of the Hmisc package version 4.0-3 (Harrell *et al.*, 2017) with multiple test  
178 adjustments using the p.adjust() function in R.

## 179 RNA-Seq library construction and sequencing

180 We sequenced and analyzed transcriptomes of 19 individuals of *I. batatas* to examine  
181 gene expression differences associated with leaf shape variation associated with circularity,  
182 aspect ratio, and EFD symPCs to obtain an initial set of candidate genes underlying these traits.  
183 We selected greenhouse-grown accessions with differing leaf shape trait values (Fig. S1). Since  
184 high aspect ratio represents both longitudinally longer or latitudinally broader leaf shape  
185 phenotypes, we chose to only examine individuals that had high aspect ratio due to latitudinal



186 elongation. We chose multiple accessions to assess each leaf shape trait; eleven for circularity  
187 (six entire, five lobed), eight for aspect ratio (four high and low AR, each), 6 individuals for EFD  
188 symPC1 (three high and three low) and four accessions each for EFD symPC2 and EFD symPC3  
189 (two high and two low) (Fig. S1); EFD symPC4 was not considered for differential expression  
190 analysis.

191 We used three to five leaves that were in P4-P6 stage of growth (fourth to sixth youngest  
192 primordium), from multiple branches of each individual accession for RNA extractions, and  
193 combined replicate leaves per individual to increase the depth of the transcriptome. We sampled  
194 all individuals on the same day within 1 hour to reduce variation due to developmental stage  
195 and/or time of collection. We froze samples in liquid nitrogen prior to preserving them at  $-80^{\circ}$  for  
196 further processing. We performed RNA extraction using Qiagen RNeasy Plant mini kit with the  
197 optional DNase digestion step, and constructed libraries using the TruSeq Stranded mRNA  
198 Sample Preparation protocol (LS protocol). After barcoding, we bulked all libraries and  
199 performed one lane of Illumina HiSeq2500 sequencing.

## 200 RNA-Seq data processing and transcriptome analysis

201 An overview of our RNA-Seq data processing and transcriptome analysis is given in Fig.  
202 2, with detailed information presented in Method S1.

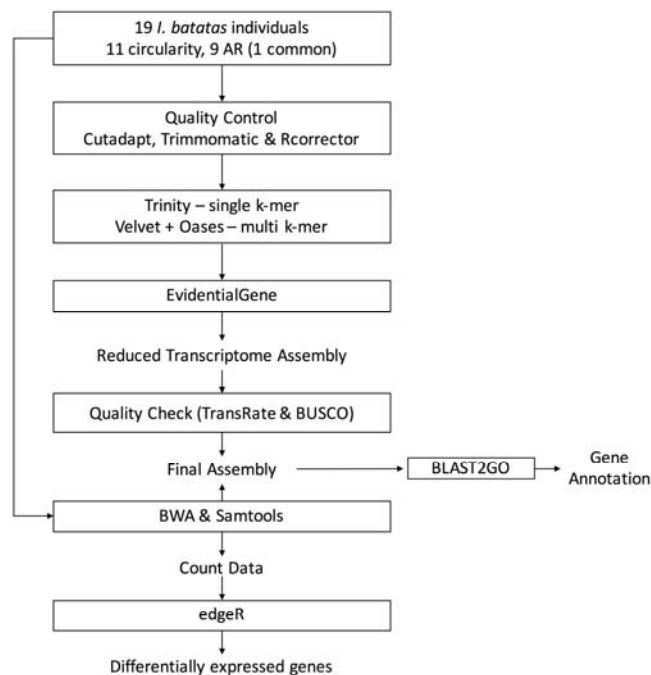

**Figure 2.** Methodology for RNA-Seq data processing for differential gene expression

*Differential gene expression*--We mapped reads from all 19 individuals to the *de novo* assembled transcriptome using BWA-MEM v0.7.15 (Li, 2013) and estimated read counts for uniquely mapped reads using samtools v1.9 (Li *et al.*, 2009). We then used read counts to filter out lowly expressed transcripts using the Bioconductor package edgeR version 3.18.1 (Robinson *et al.*, 2010) such that transcripts were retained only if they had greater than 0.5 counts-per-million in at least two samples. We then normalized libraries in edgeR (using the trimmed mean of *M*-values method) followed by differential gene expression analysis using classic pairwise comparison of edgeR version 3.18.1. We extracted the significance of differentially expressed transcripts (DETs) with  $FDR \leq 0.05$ .

## 223 Field experiment

224 We performed a field experiment to determine the extent to which genetics, the  
225 environment, and GxE interactions influence leaf shape traits. We generated replicate individuals  
226 by planting 5 cm cuttings of the stem of each accession in 4-inch pots, randomly positioned on a  
227 mist bench at the Matthaei Botanical Gardens. During the first week of June, we planted three to

228 seven replicates of each of the 68 accessions in two common gardens--one located at the  
229 Matthaei Botanical Gardens in Ann Arbor, MI (42.18° N, 83.39° W), and the other at the Ohio  
230 University Student Farm, West State Street Research Site in Athens, OH (40.46° N, 81.55° W).  
231 Replicates were planted in either three (MI) or seven (OH) blocks in a completely randomized  
232 block design with 14-inch spacing between individuals. Blocks were kept relatively weed free  
233 but were otherwise allowed to grow undisturbed. We randomly sampled 2-5 mature leaves from  
234 each individual in the first week of October, prior to the first frost, and scanned them for leaf  
235 shape analyses as explained before.

236 *Data analysis*--We first examined the potential for variation in leaf shape due to environmental  
237 differences (i.e. variation due to being grown in MI or OH) by performing an ANOVA. To  
238 normalize leaf shape traits, we used the function TransformTukey from rcompanion version  
239 2.0.0 (Mangiafico, 2018). TransformTukey is a power transformation based on Tukey's ladder of  
240 Powers, which loops through multiple powers and selects the one that normalizes the data most.  
241 These normalized leaf shape traits were then used as dependent variables and accession, garden,  
242 block effects and an interaction term of accession and garden as independent variables in the  
243 following fixed-effects model:

244 
$$\text{(Trait} \sim \text{Accession} + \text{garden} + \text{block} + \text{Accession:garden}).$$

245 The term accession represents the genetic component, garden represents variation due to  
246 environment (plasticity), Accession:garden represents the GxE component and the block effect  
247 captures microenvironmental variation (and was nested within each garden). To quantify the  
248 relative effects of each of these variables on leaf shape, we calculated eta squared ( $\eta^2$ ) as a  
249 measure of the magnitude of effect size using the Bioconductor package lsr version 0.5 (Navarro,  
250 2013). Eta squared for an effect is measured as  $SS_{\text{effect}}/SS_{\text{total}}$ , where  $SS_{\text{effect}}$  is the sum of squares  
251 of the effect of interest and  $SS_{\text{total}}$  is the total sum of squares of all the effects, including  
252 interactions. In other words, it is a measure of the proportion of variance in the dependent  
253 variable associated with independent variable and is one of the most commonly reported  
254 estimates of effect size for ANOVA (Levine & Hullett, 2002; Jalongo, 2016). Further, we  
255 calculated broad sense heritabilities of leaf shape traits to determine the extent to which traits are  
256 genetically controlled within each environment. Broad sense heritability was calculated using  
257 linear mixed modeling with the Bioconductor package sommer version 3.4 (Covarrubias-  
258 Pazaran, 2016) based on the phenotypic data collected from the two fields. The model used was

259 
$$\text{Trait} \sim 1, \text{random} = \sim \text{Accession} + \text{block} + \text{Accession:block}, \text{rcov} = \sim \text{units}$$

260 Variance components from the model were used to calculate the broad-sense heritability  
261 ( $H^2$ ) using the formula:

$$H^2 = \frac{V_g + V_e + V_{gxe} + V_r}{V_g}$$

262 where  $V_g$  is the genotype variance,  $V_e$  is the environmental variance due to the blocks,  $V_{gxe}$  is the  
263 variance associated with  $V_{gxe}$  (accession:block), and  $V_r$  is the residual variance.

## 264 RESULTS

### 265 Leaf shape variation among accessions

266 We found wide variation in leaf traits across 57 *I. batatas* accessions (Table 1). Among  
267 the three traditional traits examined, circularity is most variable with a phenotypic coefficient of  
268 variation (PCV;  $(\text{standard deviation}(x)/\text{mean}(x))*100$ ; where  $x$  is the trait of interest) of 22.61%  
269 while aspect ratio is least variable with a narrow distribution and PCV of 4.76%. Figure 3 shows  
270 the phenotypic diversity with respect to two leaf traits, circularity and aspect ratio (AR). Of our  
271 57 accessions, 10 exhibit low circularity (defined as circularity  $< 0.50$ ). PI 599387, for example,  
272 exhibited leaves that are very deeply lobed and thus has a low circularity (0.09) value. In  
273 contrast, PI 566647 has no serrations or lobing (entire margins) and thus exhibits high circularity  
274 (0.71; Fig. 3). Additionally, we found 22 of 57 accessions to exhibit high aspect ratio (AR  $>$   
275 1.11). For example, PI 531134 (AR = 1.03) has almost equal values of major and minor axis and  
276 thus a low aspect ratio value. In contrast, the leaves of PI 208886 (AR = 1.268) are much wider,  
277 i.e., a larger major to minor axis, and thus has high aspect ratio value. Most often this increase in  
278 AR in sweetpotato manifests itself with increase leaf width (eg. PI 566646, PI 208886) relative  
279 to length (eg. PI 634379). Further, although solidity values range from 0.44-0.95, only 5  
280 accessions had solidity values less than 0.7 (PCV = 11.85%). The lack of low solidity values  
281 indicates that only a few accessions have deeply lobed leaves (eg. PI 599387, solidity = 0.44), in  
282 contrast to accessions with slightly lobed leaves (eg. PI 566630, solidity = 0.76).

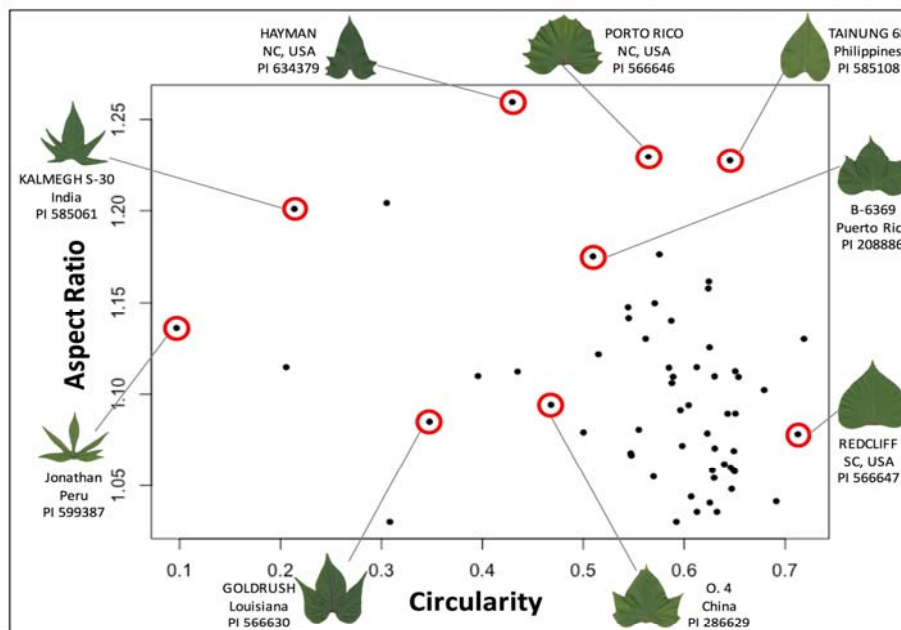

283 **Figure 3.** Leaf shape variation in a sample of accessions of sweetpotato, *Ipomoea batatas*, highlighting exceptionally high morphological variation.

284 We performed an EFD analysis on leaf outlines to get a more global estimation of leaf  
285 shape variation (Fig. 4). In total, we processed 292 leaves from 57 accessions to identify leaf  
286 shape traits that explain symmetrical shape variation in sweetpotato. Low symPC1 values  
287 describe leaves with deep lobing, prominent tip and shallow petiolar sinus (PI 573318) whereas  
288 high symPC1 values explain non-lobed leaves with flattened leaf tips and enclosed petiolar sinus  
289 (PI 566646). symPC2 explains variation in leaf shape due to differences in breadth and lobing of  
290 the leaf (low symPC2 values describe broad leaves with two lobes whereas high symPC2 values



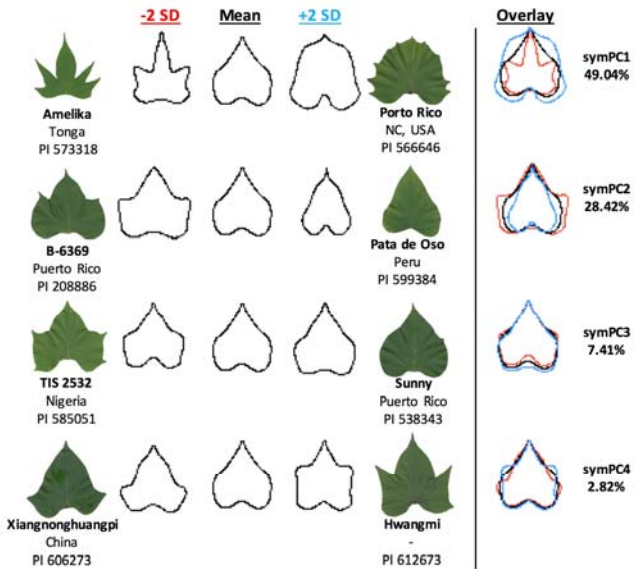

**Figure 4:** EFDs of symmetrical shape variation. Contours represent eigenleaves resulting from PCA on symmetrical shape (symPC) on EFDs. Shown are the first four PCs with the percent variation explained by each; 87.79% of total variation is explained. -2SD (red) and + 2SD (blue) represent two units of standard deviation from the mean along the PC. Representative leaves of accessions with extreme PC values are shown.

depicts narrow leaves with no lobes). symPC3 primarily captures leaf shape variation due to the depth of petiolar sinus (low symPC3 values describe leaves with highly enclosed petiolar sinus as compared to high symPC3 eigenleaves which have flattened sinus). Lastly, symPC4 represents variation in leaf shape attributed to the angle of lobe tips -- low symPC4 eigenleaves have lobes with a high obtuse angle (almost 160°) whereas high symPC4 eigenleaves have lobes with a lower obtuse angle (almost 125°). The four symPC components together explain 87.79% of total variance relating to symmetrical leaf shape variance in sweetpotato.

Further, we calculated correlation matrices for traditional shape descriptors and EFD symPCs to determine if they capture different aspects of leaf shape (Fig. S2). We found that symPC1 is correlated

312 with circularity ( $r = 0.20$ ;  $P = 0.03$ ) and solidity ( $r = 0.20$ ;  $P = 0.02$ ), which is expected as  
 313 symPC1 partially captures shape differences due to lobing. Additionally, circularity was highly  
 314 correlated with solidity ( $r = 0.96$ ;  $P < 0.001$ ). This is not surprising as circularity is a measure of  
 315 serrations and lobing whereas solidity is a measure of deep lobing; leaves having deep lobes (and  
 316 lacking serrations) will thus have similar values of circularity and solidity.

### 317 Sequencing and *de novo* assembly of *I. batatas* transcriptome

318 We performed a transcriptomic survey to identify gene expression changes associated  
 319 with the leaf shape traits described above. For our analyses of the transcriptome, Illumina  
 320 HiSeq2500 returned a total of 266 million (125bp) paired-end sequence reads; on average, each  
 321 individual had 14 million (M) reads (GEO Submission ID-GSE128065) which was used to  
 322 construct a *de-novo* transcriptome assembly (sequence statistics are presented in Table 2). The  
 323 results from BUSCO (Simão *et al.*, 2015) indicate that the *de novo* transcriptome assembly is of  
 324 high quality with 91.32% (1315/1440) complete genes found (single copy genes ~87%) of which  
 325 only 4.51% were duplicates. Additionally, only 6.32% of genes were missing from the  
 326 assembled transcriptome. Thus, our sequencing and assembly strategy produced a relatively  
 327 complete transcriptome. Using blastx, 24,565 transcripts were annotated by the functional  
 328 description of their top 20 hits. The transcriptome is available at Transcriptome Shotgun  
 329 Assembly Database hosted by NCBI (TSA accession # GHHM01000000).

### 330 Identification and functional annotation of differentially expressed transcripts (DETs)

331 As a first step towards understanding the genetic control of leaf shape, we identified gene  
 332 expression changes associated with multiple leaf shape traits -- circularity, aspect ratio  
 333 (latitudinal expansion) and the symPCs obtained from the EFD analysis. We did not consider

334 solidity and symPC4 due to their high correlation to circularity and low level of variation  
335 captured, respectively. On average, we found that 11 million unique paired-end reads per  
336 individual (range 7.66M - 14.23M) mapped back to the reference transcriptome (net mapping  
337 efficiency of 89.65% with the paired-end high-quality reads). This indicates that we had  
338 sufficient read depth (>10M) to continue with our differential expression analysis (as shown by  
339 Wang *et al.*, 2011).

340 We uncovered 530 DETs associated with our leaf shape traits (Figure 5, Table S2).  
341 Specifically, we found 47 DETs associated with circularity, and 158 DETs associated with  
342 aspect ratio. For the symPCs examined, we found 121 DETs associated with symPC1, 148 DETs  
343 with symPC2 and 56 DETs with symPC3. Functional annotation of these DETs uncovered  
344 putative leaf shape genes (Table 3). As an example, for circularity, FAR1-related sequence 5 (or  
345 *FRS5*), a putative transcription factor involved in regulating light control of development, is  
346 differentially regulated with log fold-change of 5.77. Among other DETs for circularity, we  
347 found genes that are involved in regulating cell proliferation and organ morphogenesis  
348 (*EXO70A1*-like and extra-large guanine nucleotide-binding protein) and could be involved in  
349 regulating leaf dissection.

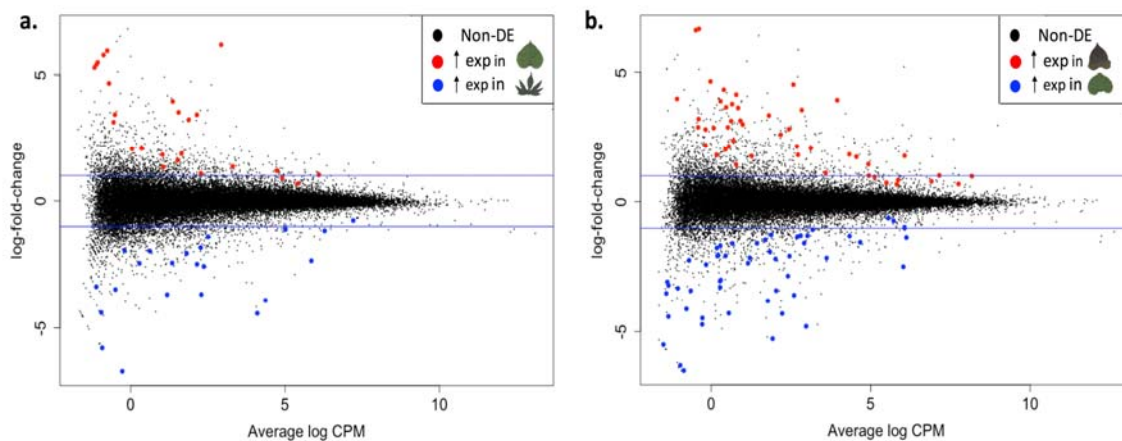

**Figure 5:** Plot of log-fold change against log CPM (counts per million) with differentially expressed transcripts highlighted (red and blue dots). **a.** Red and blue dots represent transcripts with higher expression in entire and lobed respectively. **b.** Red and blue dots represent higher expression in high aspect ratio and low aspect ratio individuals respectively.

350

351 Among the 158 transcripts differentially expressed for AR (broad leaves vs rounder  
352 leaves), two genes have been shown in literature to alter the longitudinal vs latitudinal expansion  
353 of the leaves. These are *CHS* (chalcone synthase), an enzyme involved in the production of  
354 chalcones involved in flavonoid biosynthesis, and feruloyl CoA 6'-hydroxylase which is  
355 involved in scopoletin biosynthesis and causes post-harvest physiological deterioration in  
356 cassava (Liu *et al.*, 2017). Finally, we also found LIGHT-DEPENDENT SHORT HYPOCOTYL  
357 10 (*LSH10*), to be significantly downregulated (log-fold change of -1.85; P-value < 0.001)

358 Individuals with extreme values of symPC1, a trait differentiating leaf shape based on  
359 lobing and prominence of tips and petiolar sinus, were also analyzed for DETs. Of the 121  
360 transcripts showing differential expression, two genes had interesting functional annotations. We  
361 found a homeobox gene (*HAT22*) to be upregulated in individuals with high symPC1 (leaves

362 lacking lobes with flattened leaf tips and enclosed petiolar sinus), with a log-fold change of 1.56.  
 363 We also found another member of the *FRF1* family -- FAR1-related sequence 7 (or *FRS7*) -- to  
 364 be upregulated in the high symPC1 individuals, like in the case of circularity.

365 We found a total of 148 DETs for symPC2, which explains variation in leaf shape due to  
 366 the differences in the broadness and lobing of the leaf. Again, we found two copies of chalcone  
 367 synthase (*CHS*) were negatively regulated in high symPC2 individuals. We also found Sporamin  
 368 B transcript, a tuberous root protein (Yeh *et al.*, 1997), to be significantly downregulated (with  
 369 log-fold change of -2.76; P-value < 0.001). Finally, we identified 56 transcripts that were  
 370 differentially expressed with respect to symPC3; however, functional annotation revealed that  
 371 most genes belonged to chloroplastic or mitochondrial genes.

## 372 Field experiment

373 We performed a field experiment to examine leaf shape in different environments, with  
 374 the specific goal to determine the extent to which genotype, environment, and GxE altered leaf  
 375 shape. We found significant variation among accessions (indicating genotypic or genetic  
 376 variation) for circularity, aspect ratio and solidity ( $F_{73} = 18.06$ ,  $F_{73} = 4.22$ ,  $F_{73} = 21.09$ ;  $P <$   
 377  $0.001$ ), with accession explaining 73.23%, 38.40% and 77.18% of the total variation,  
 378 respectively (Table 4). This high variance explained for circularity and solidity is reflected in  
 379 high heritability values (Table 5;  $H^2_{MI\_cir} = 0.79$ ,  $H^2_{OH\_cir} = 0.73$ ;  $H^2_{MI\_solidity} = 0.82$ ,  $H^2_{OH\_solidity} =$   
 380  $0.76$ ). We also found evidence of significant block effect ( $F_8 = 3.01$ ,  $P = 0.002$ ;  $\eta^2 = 1.33\%$ ) for  
 381 circularity, whereas aspect ratio and solidity were not significantly influenced by block effects.  
 382 Garden differences between OH and MI contributed 1.93% ( $F_1 = 15.55$ ,  $P < 0.001$ ) of the  
 383 variability in AR while the accession by garden interaction contributed 12.95% (a significant  
 384 GxE effect:  $F_{69} = 5.01$ ,  $P = 0.009$ ). AR also had lower heritability within each garden (Table 5;  
 385  $H^2_{MI\_AR} = 0.39$ ,  $H^2_{OH\_AR} = 0.26$ ). Circularity and solidity were not significantly altered by  
 386 environment and had no significant differences due to GxE.

387 We also examined symmetrical leaf shape variation in both field sites by performing an  
 388 EFD analysis (Figure 6). EFDs from MI captured variation in leaf shape homologous to the  
 389 symPCs estimated from greenhouse grown individuals. There was general congruence in

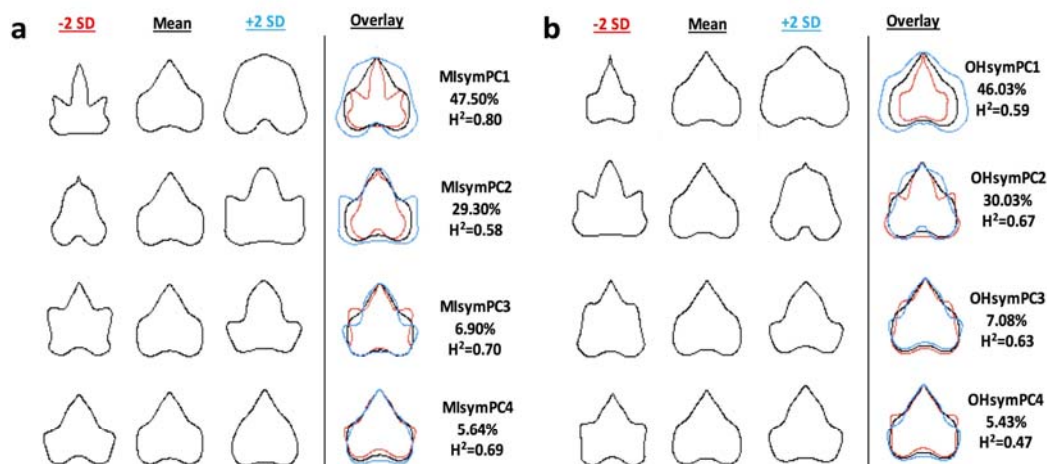

**Fig. 6** EFDs of symmetrical leaf shape variation among 68 accessions of sweetpotato in the common gardens in Michigan (a) and Ohio (b), respectively.

390 symPCs between greenhouse and field grown leaves in MI (i.e., MIsymPC1 (field)  $\approx$  symPC1  
391 (greenhouse)), but leaf shape variation captured by EFDs from OH differed significantly in their  
392 order of variation explained (Fig. S3). OHsymPC1 explained leaf shape variation due to  
393 differences in the broadness and lobing of the leaf (similar to MIsymPC2), whereas OHsymPC2  
394 explained variation due to lobing, tip and petiolar sinus differences (similar to MIsymPC1). This  
395 indicates that in OH the majority of leaf shape diversity is primarily due to the broadness of the  
396 leaf and secondly due to leaf lobing, while in MI, it is the opposite-- the majority of leaf shape  
397 diversity is due to the leaf dissection rather than leaf width. Thus, although traditional shape  
398 descriptors are only slightly influenced by the environment, leaf shape as a whole can be altered  
399 significantly by the environment.

400 We also calculated broad sense heritability values for the symPCs in their respective  
401 environments and found that  $H^2$  values ranged from 0.47-0.80 across the symPCs (Figure 6).  
402 Heritability values in the OH garden were consistently lower than in the MI garden due to  
403 reduced genetic variance and increased environmental variance. Overall, the high heritability  
404 values indicate that leaf morphology is controlled to a great extent by genetic factors.

## 405 **DISCUSSION**

406 In this study, we examined the extent of leaf shape variation within an agronomically  
407 important species, determined the role of genetics, the environment and GxE in altering leaf  
408 shape traits, and identified potential candidate genes associated with multiple leaf shape traits.  
409 We found evidence of extensive intraspecific morphological variation, with shape differences  
410 due to lobing, length-to-width ratio of leaves and the prominence of tip and petiolar sinuses  
411 explaining the majority of the variation. We also found that leaf shape has a strong genetic basis  
412 with most phenotypic variation attributed to accessional variation, with low or limited influence  
413 of GxE. Strikingly, we show that although traditional shape descriptors are only slightly  
414 influenced by the environment in this species, when measured comprehensively, leaf shape can  
415 be significantly altered by the environment (evident by the change in symPC1 across the MI and  
416 OH gardens). Below, we expand on each of our findings, and place them in the context of current  
417 knowledge about leaf shape diversity at a species-level as well as what is known about the  
418 environmental influence on leaf shape in other species.

### 419 *High morphological diversity of leaf shape in I. batatas*

420 A recurring question among plant morphologists is the extent to which leaf shape varies  
421 among genotypes in a species. This study quantified leaf shape variation among multiple  
422 replicated accessions of sweetpotato and identified traits contributing most to leaf shape  
423 variation. We focused our morphometric study on three traditional shape descriptors (circularity,  
424 aspect ratio and solidity) and then expanded into the more comprehensive Elliptical Fourier  
425 Descriptor (EFD) measures.

426 In our analysis of traditional measures, circularity was found to be the most variable  
427 whereas aspect ratio was found to be least variable. Further, the first two principal components  
428 of the EFD analysis together accounted for 77.46% of the total variation in leaf shape, and  
429 described variation associated with petiolar sinus, tips, and positioning of lobes. Additionally,  
430 lack of correlation between symPCs and traditional leaf shape metrics suggests that they capture  
431 different features of shape. Only symPC1 was slightly correlated with circularity and solidity.



432 This is not surprising since symPC1 captures variation in leaf shape due to lobing, tip and sinus.  
433 No other traits were found to be correlated. Thus, variation captured by the EFD symPCs would  
434 have been missed by simply quantifying traditional shape descriptors, suggesting that the use of  
435 comprehensive morphometric techniques can help quantify the full extent of shape variation  
436 across species. Further, combining the results from traditional morphometric approaches with  
437 EFDs revealed that variation in leaf dissection (circularity and symPC1) contributes most to the  
438 morphological variation in leaf shape in sweetpotato (Fig. 3 and Fig. 4), similar to that seen in  
439 grape (Chitwood *et al.*, 2014b). In addition, aspect ratio explains a significant proportion of the  
440 remaining variation, unlike in tomato and apple where aspect ratio is the primary trait of  
441 variation in leaf shape (Chitwood *et al.*, 2013; Migicovsky *et al.*, 2017). This indicates that leaf  
442 shape variation does not follow a trend across species which is likely due to multiple  
443 independent evolution of leaf shape across phylogenetic taxa (Nicotra *et al.*, 2011).

#### 444 *Gene transcripts underlying leaf shape variation*

445 To further our understanding of gene expression changes underlying leaf shape diversity,  
446 we sequenced transcriptomes of 19 accessions and assembled a high-quality gene expression  
447 database for performing a differential expression analysis in *I. batatas*. We found 47 genes that  
448 were differentially expressed for circularity and 121 DETs for symPC1 -- a trait that accounts for  
449 leaf shape differences due to leaf dissection, prominence of the tip and petiolar sinus. Functional  
450 annotations of these genes identified potential candidates that could contribute to leaf shape  
451 dissection in *I. batatas* (Table 3). The most promising candidate is *FRS* gene; we found *FRS5*  
452 and *FRS7* to be upregulated in non-dissected individuals in the differential analysis for  
453 circularity and symPC1, respectively. *FRS* is a putative transcription factor and contains the  
454 DNA binding domain needed to bind the RB-box promoter region of *STM* (*SHOOT*  
455 *MERISTEMLESS*) (Aguilar-Martínez *et al.*, 2015), a protein required for leaf serrations  
456 (Kawamura *et al.*, 2010). *FRS* might bind to *STM* thus regulating its expression. However, we  
457 did not find *STM* to be differentially expressed in our datasets. This might be due to no real  
458 expression differences or it might indicate that the expression differences is really small and thus  
459 the gene is not detected to be differentially expressed.

460 Furthermore, genes containing homeobox domains have been shown to be associated  
461 with leaf dissection in multiple species --e.g., *PTS* in tomato (Kimura *et al.*, 2008), *STM* in  
462 *Arabidopsis* (Piazza *et al.*, 2010), *RCO* in *C. hirsuta* and other Brassicaceae (Vlad *et al.*, 2014;  
463 Sicard *et al.*, 2014) and *LMII* in cotton (Andres *et al.*, 2016). Most of these genes are  
464 differentially regulated in the SAM (shoot apical meristem) and P0 (the youngest primordium) to  
465 determine the extent of leaf dissection and complexity for the genotype. However, we did not  
466 find any homeobox domain containing genes to be differentially expressed in sweetpotato  
467 accessions that varied for circularity (*i.e.* lobed vs entire) (Table S3) but found a homeobox  
468 leucine-zipper protein (*HAT22*) to be upregulated for high symPC1 individuals. This mismatch  
469 could represent a caveat to our transcriptomic sampling stage (P4-P6), which is past the leaf  
470 dissection morphogenic stage of development. Thus, although preliminary, our data indicate that  
471 the degree of lobing in *I. batatas* might be maintained in later stages of leaf development (P4-P6)  
472 by the action of a gene containing a homeobox domain and that the difference in expression  
473 required might be very small.

474 Further, we found a total of 158 differentially expressed genes associated with aspect  
475 ratio and 148 DETs associated with symPC2 (leaf shape due to the differences in the broadness



476 and lobing). Based on the function of the homologs of these genes, we identified promising  
477 putative candidate genes responsible for broad leaved phenotypes (Table 3). In apples, a  
478 transgenic *CHS* silenced individual developed longer leaves when supplied with naringenin, thus  
479 altering leaf AR. This indicates that higher expression of *CHS* (and thus naringenin) is  
480 responsible for the longitudinal expansion of the leaves and thus downregulation of *CHS* could  
481 lead to broader leaves due to the lack of longitudinal expansion. Another gene of interest that we  
482 found differentially expressed for aspect ratio, feruloyl CoA 6'-hydroxylase, produces broader  
483 leaved phenotypes of cassava when silenced (Liu *et al.*, 2017). Interestingly, however, we found  
484 *higher* expression of feruloyl CoA 6'-hydroxylase2 in broader-leaved, compared to the rounder-  
485 leaved individuals. Finally, the differentially expressed *LSH10* belongs to the family of *LSH*  
486 genes, which have been shown to interact with BOP (BLADE-ON-PETIOLE) and regulate *PTS*  
487 (PETROSELINUM) expression, a gene that regulates *KNOX* genes, and thus leaf complexity  
488 (Ichihashi *et al.* 2014). This indicates the potential role of *LSH* gene in regulating both leaf  
489 broadness and complexity in this species.

#### 490 *Factors influencing leaf shape traits in multiple environments*

491 While studies often examine the potential for plasticity in leaf shape traits (McLellan,  
492 2000; Royer *et al.*, 2009; Viscosi, 2015), the relative influence of genetic background,  
493 environment and gene by environment interactions are less commonly examined. We show that  
494 leaf shape traits (circularity, aspect ratio and solidity) in sweetpotato are influenced by multiple  
495 effects. Variation in circularity and solidity were mostly attributed to accession (or genotype) and  
496 showed little to no effect due to environment or gene by environment interaction. Circularity and  
497 solidity have exceptionally high broad-sense heritability values in *I. batatas* (0.76 and 0.79  
498 respectively, averaged between gardens). These traits have likewise been shown to be highly  
499 heritable in tomato with heritability values being 0.65 and 0.67, respectively (Chitwood *et al.*,  
500 2013). The high PCV for circularity and solidity in *I. batatas* (22.61% and 11.85%) along with  
501 high broad-sense heritability indicates that there is a lot of standing variation for these traits that  
502 can be actively selected for (or against) by breeders. Furthermore, the lack of plasticity and GxE  
503 demonstrate the stability of these simple leaf shape descriptor traits, at least in the environments  
504 tested.

505 Contrary to our results, multiple studies have found that leaf dissection--captured here by  
506 our measure of circularity--is a plastic trait that responds to changes in temperature. For example,  
507 Royer and colleagues (2009, 2012) found that leaves of *Acer rubrum* were more dissected when  
508 grown in cooler environments as compared to warmer environments. A similar trend was  
509 observed in grapevine (*Vitis* spp.) (Chitwood *et al.*, 2016). However, we found that leaf  
510 dissection in sweetpotato is not influenced by the environment. This could reflect that our  
511 gardens were not different enough to lead to plastic responses in these two measures of leaf  
512 shape. The Ohio garden was consistently warmer (by 2°C on average) and experienced less  
513 precipitation than the Michigan garden--the difference between the two gardens was 662.43  
514 mm/month on average throughout the growing season. Although there were environmental  
515 differences between gardens, before we conclude that circularity in *I. batatas* is not strongly  
516 environmentally responsive, multiple studies in environments that range more widely for  
517 temperature will need to be performed.

518 Comparatively, we found significant variation in aspect ratio due to environment and  
519 GxE, explaining 1.93% and 12.95% of the total observed variation in this measure of leaf shape,

520 respectively. This is reflected in the significant alteration of trait values between environments.  
521 There was small yet significant differences observed ( $P < 0.001$ ; 95% CI = 0.009-0.03) between  
522 gardens, with clones grown in Michigan consistently showing less round, more elliptical leaves  
523 than clones grown in the Ohio garden. However, we still found that 38.40% of the variation in  
524 the trait was due to accessional variation which was also indicated in the estimated heritability  
525 value of the trait ( $h^2 = 0.24$ ). Aspect ratio has been found to be a major source of leaf shape  
526 variation in apples and tomatoes with high heritabilities of 0.75 and 0.63, respectively (Chitwood  
527 *et al.*, 2013; Migicovsky *et al.*, 2017). In contrast, we found that this important leaf shape trait is  
528 globally not as variable in sweetpotato (4.76% PCV), but it still presents a selection potential.  
529 The considerable effect of GxE on aspect ratio indicates that this trait has a genetic component  
530 that interacts with the environment leading to varied values between environment.

531 Further, comparing leaf outlines between two environments, we found that although the  
532 traits explaining leaf shape variation are homologous between the two environments, these traits  
533 vary in the percent of variation they explain. The heritability of EFD symPCs measured in MI  
534 and OH were found to be very high, yet the changes in the amount of variation they explain in  
535 their respective environments indicates a strong environmental (and/or GxE) influence on EFD  
536 symPCs measured. Although traditional shape descriptors were only slightly controlled by the  
537 environment (aspect ratio), we found that the more comprehensive measure of leaf shape can be  
538 altered significantly by the environment. This further signifies the importance of measuring leaf  
539 shape using methods apart from traditional shape descriptors in multi-environment conditions.

540 Overall, this work highlights the extensive natural variation in leaf shape within the globally  
541 important domesticate *I. batatas*. More broadly, and considering leaf shape analyses from other,  
542 mostly domesticated species, leaf shape variation appears to be species specific -- there is no  
543 evidence of a shared trait between species that explains the majority of within-species variation.  
544 Additionally, we found that most of the variation in the traditional measures of leaf shape  
545 appears to be largely controlled by genetic factors in sweetpotato, with a low proportion of  
546 variance in leaf shape attributable to environmental differences between gardens. However,  
547 when leaf shape was considered more comprehensively and by the use of leaf outlines, we  
548 identified a significant influence of the environment, suggesting that studies relying solely on  
549 circularity or aspect ratio to describe leaf shape may not capture the extent to which  
550 environmental factors can impact leaf development. This multilevel examination highlights the  
551 importance of examining morphological variation at the species-level in multiple environments,  
552 and using a range of leaf shape phenotypes to comprehensively understand the mechanistic basis  
553 (morphological, molecular and environmental) of leaf shape.

## 554 ACKNOWLEDGEMENTS

555 We are grateful to Robert Jarrett (USDA, Tifton, GA) for providing the sweetpotato  
556 accessions. We thank the staff of Matthaei Botanical Garden and Nichols Arboretum (MBGNA,  
557 Ann Arbor) for helping us grow and maintain the accessions. We also thank Dan York, Tyler  
558 Marrs, Tilottama Roy, Andrew Fox, Jordan Francisco, Yufei Gao, Abby Singletary and Nicholas  
559 Tomeo for growing the plants in the field and collecting data. We are also thankful to Daniel H.  
560 Chitwood for comments on the manuscript. Funding for this work was provided by the  
561 University of Michigan and Ohio University.

## 562 AUTHOR CONTRIBUTIONS

563

564 RSB and DMR conceived of the research idea; SG, RSB and DMR performed the  
565 experiments and SG performed data analyses with RSB's supervision. SG wrote the manuscript  
566 in consultation with RSB, DMR, JRS.

## 567 REFERENCES

568 **Abràmoff MD, Magalhães PJ, Ram SJ. 2004.** Image processing with imageJ. *Biophotonics*  
569 *International*.

570 **Aguilar-Martínez JA, Uchida N, Townsley B, West DA, Yanez A, Lynn N, Kimura S, Sinha**  
571 **N. 2015.** Transcriptional, posttranscriptional, and posttranslational regulation of SHOOT  
572 MERISTEMLESS gene expression in Arabidopsis determines gene function in the shoot apex.  
573 *Plant physiology* **167**: 424–442.

574 **Andersson S. 1991.** Geographical variation and genetic analysis of leaf shape in *Crepis tectorum*  
575 (*Asteraceae*). *Plant systematics and evolution = Entwicklungsgeschichte und Systematik der*  
576 *Pflanzen*.

577 **Andres RJ, Coneva V, Frank MH, Tuttle JR, Samayoa LF, Han S-W, Kaur B, Zhu L, Fang**  
578 **H, Bowman DT, et al. 2016.** Modifications to a LATE MERISTEM IDENTITY1 gene are  
579 responsible for the major leaf shapes of Upland cotton (*Gossypium hirsutum* L.). *Proceedings of*  
580 *the National Academy of Sciences* **114**: E57–E66.

581 **Arber, A. 2010.** Water Plants: A Study of Aquatic Angiosperms (Cambridge Library Collection  
582 - Botany and Horticulture). Cambridge: Cambridge University Press.  
583 doi:10.1017/CBO9780511700675.

584 **Bailey IW, Sinnott EW. 1916.** The Climatic Distribution of Certain Types of Angiosperm  
585 Leaves. *Source: American Journal of Botany*.

586 **Campitelli BE, Stinchcombe JR. 2013.** Natural selection maintains a single-locus leaf shape  
587 cline in Ivyleaf morning glory, *Ipomoea hederacea*. In: *Molecular Ecology*. 552–564.

588 **Chitwood DH, Kumar R, Headland LR, Ranjan A, Covington MF, Ichihashi Y, Fulop D,**  
589 **Jiménez-Gómez JM, Peng J, Maloof JN, et al. 2013.** A Quantitative Genetic Basis for Leaf  
590 Morphology is Revealed in a Set of Precisely Defined Tomato Introgression Lines. *The Plant*  
591 *cell* **25**: 2465–2481.

592 **Chitwood DH, Kumar R, Ranjan A, Pelletier JM, Townsley BT, Ichihashi Y, Martinez CC,**  
593 **Zumstein K, Harada JJ, Maloof JN, et al. 2015.** Light-Induced Indeterminacy Alters Shade-  
594 Avoiding Tomato Leaf Morphology. *Plant physiology* **169**: 2030–2047.

595 **Chitwood DH, Otoni WC. 2017.** Morphometric analysis of *Passiflora* leaves: The relationship  
596 between landmarks of the vasculature and elliptical Fourier descriptors of the blade.  
597 *GigaScience*.

598 **Chitwood DH, Ranjan A, Kumar R, Ichihashi Y, Zumstein K, Headland LR, Ostria-**  
599 **Gallardo E, Aguilar-Martínez JA, Bush S, Carriedo L, et al. 2014a.** Resolving Distinct

- 600 Genetic Regulators of Tomato Leaf Shape within a Heteroblastic and Ontogenetic Context. *The*  
601 *Plant cell*.
- 602 **Chitwood DH, Ranjan A, Martinez CC, Headland LR, Thiem T, Kumar R, Covington MF,**  
603 **Hatcher T, Naylor DT, Zimmerman S, et al. 2014b.** A Modern Ampelography: A Genetic  
604 Basis for Leaf Shape and Venation Patterning in Grape. *Plant physiology*.
- 605 **Chitwood DH, Rundell SM, Li DY, Woodford QL, Yu TT, Lopez JR, Greenblatt D, Kang**  
606 **J, Londo JP. 2016.** Climate and developmental plasticity: interannual variability in grapevine  
607 leaf morphology. *Plant physiology*.
- 608 **Chitwood DH, Sinha NR. 2016.** Evolutionary and Environmental Forces Sculpting Leaf  
609 Development. *Current biology: CB* **26**: R297–306.
- 610 **Conesa MÀ, Mus M, Rosselló JA. 2012.** Leaf shape variation and taxonomic boundaries in two  
611 sympatric rupicolous species of Helichrysum (Asteraceae: Gnaphalieae), assessed by linear  
612 measurements and geometric morphometry: LEAF SHAPE VARIATION IN HELICHRYSUM.  
613 *Biological journal of the Linnean Society. Linnean Society of London* **106**: 498–513.
- 614 **Covarrubias-Pazarán G. 2016.** Genome-Assisted prediction of quantitative traits using the r  
615 package sommer. *PloS one*.
- 616 **De Vries CA, Ferwerda JD, Flach M. 1967.** Choice of food crops in relation to actual and  
617 potential production in the tropics. *Netherlands Journal of Agricultural Science* **15**:241–248.
- 618 **Firon N, LaBonte D, Villordon A, Kfir Y, Solis J, Lapis E, Perlman TS, Doron-Faigenboim**  
619 **A, Hetzroni A, Althan L, et al. 2013.** Transcriptional profiling of sweetpotato (*Ipomoea batatas*)  
620 roots indicates down-regulation of lignin biosynthesis and up-regulation of starch biosynthesis at  
621 an early stage of storage root formation. *BMC genomics* **14**: 460.
- 622 **Frank E Harrell Jr, with contributions from Charles Dupont and many others. 2017.**  
623 Hmisc: Harrell Miscellaneous. R package version 4.0-3. [https://CRAN.R-](https://CRAN.R-project.org/package=Hmisc)  
624 [project.org/package=Hmisc](https://CRAN.R-project.org/package=Hmisc).
- 625 **Glennon KL, Cron GV. 2015.** Climate and leaf shape relationships in four Helichrysum species  
626 from the Eastern Mountain Region of South Africa. *Evolutionary ecology* **29**: 657–678.
- 627 **Gurevitch J. 1988.** Variation in leaf dissection and leaf energy budgets among populations of  
628 *Achillea* from an altitudinal gradient. *American journal of botany* **75**: 1298.
- 629 **Hilu KW. 1983.** The Role of Single-Gene Mutations in the Evolution of Flowering Plants. In:  
630 Hecht MK, Wallace B, Prance GT, eds. *Evolutionary Biology: Volume 16*. Boston, MA:  
631 Springer US, 97–128.
- 632 **Hopkins R, Schmitt J, Stinchcombe JR. 2008.** A latitudinal cline and response to vernalization  
633 in leaf angle and morphology in *Arabidopsis thaliana* (Brassicaceae). *The New phytologist* **179**:  
634 155–164.

- 635 **Huaman Z. 1987.** Current status on maintenance of sweet potato genetic resources at CIP, in  
636 Exploration, maintenance and utilization of sweetpotato genetic resources. CIP: Lima, Peru. 101-  
637 120.
- 638 **Hue SM, Chandran S, Boyce AN. 2012.** Variations of leaf and storage roots morphology in  
639 Ipomoea batatas L. (Sweet Potato) cultivars. In: Acta Horticulturae. 73–80.
- 640 **Huff PM, Wilf P, Azumah EJ. 2003.** Digital Future for Paleoclimate Estimation from Fossil  
641 Leaves? Preliminary Results. *Palaios* **18**: 266–274.
- 642 **Ialongo C. 2016.** Understanding the effect size and its measures. *Biochemia medica: casopis*  
643 *Hrvatskoga drustva medicinskih biokemicara / HDMB*.
- 644 **Ichihashi Y, Aguilar-Martínez JA, Farhi M, Chitwood DH, Kumar R, Millon LV, Peng J,**  
645 **Maloof JN, Sinha NR. 2014.** Evolutionary developmental transcriptomics reveals a gene  
646 network module regulating interspecific diversity in plant leaf shape. *Proceedings of the*  
647 *National Academy of Sciences of the United States of America* **111**: E2616–21.
- 648 **Iwata H, Ukai Y. 2002.** SHAPE: a computer program package for quantitative evaluation of  
649 biological shapes based on elliptic Fourier descriptors. *The Journal of heredity*.
- 650 **Jones C. 1995.** Does shade prolong juvenile development? A morphological analysis of leaf  
651 shape changes in Cucurbita argyrosperma subsp. sororia (Cucurbitaceae). *American journal of*  
652 *botany*.
- 653 **Kawamura E, Horiguchi G, Tsukaya H. 2010.** Mechanisms of leaf tooth formation in  
654 Arabidopsis. *The Plant journal: for cell and molecular biology* **62**: 429–441.
- 655 **Kays SJ, Kays SE. 1998.** Sweetpotato chemistry in relation to health. *Proceedings of the Sweet*  
656 *Potato Production System Towards the 21st Century*: 231–272.
- 657 **Khoury CK, Heider B, Castañeda-Álvarez NP, Achicanoy HA, Sosa CC, Miller RE,**  
658 **Scotland RW, Wood JRI, Rossel G, Eserman LA, et al. 2015.** Distributions, ex situ  
659 conservation priorities, and genetic resource potential of crop wild relatives of sweetpotato  
660 [ipomoea batatas (L.) lam., I. series batatas]. *Frontiers in plant science* **6**: 1–14.
- 661 **Kim GT, Shoda K, Tsuge T, Cho KH, Uchimiya H, Yokoyama R, Nishitani K, Tsukaya H.**  
662 **2002.** The ANGUSTIFOLIA gene of Arabidopsis, a plant CtBP gene, regulates leaf-cell  
663 expansion, the arrangement of cortical microtubules in leaf cells and expression of a gene  
664 involved in cell-wall formation. *The EMBO journal*.
- 665 **Kimura S, Koenig D, Kang J, Yoong FY, Sinha N. 2008.** Natural Variation in Leaf  
666 Morphology Results from Mutation of a Novel KNOX Gene. *Current biology: CB* **18**: 672–677.
- 667 **Klein LL, Caito M, Chapnick C, Kitchen C, O’Hanlon R, Chitwood DH, Miller AJ. 2017.**  
668 Digital Morphometrics of Two North American Grapevines (Vitis: Vitaceae) Quantifies Leaf  
669 Variation between Species, within Species, and among Individuals. *Frontiers in plant science*.



- 670 **Levine TR, Hullett CR. 2002.** Eta Squared, Partial Eta Squared, and Misreporting of Effect Size  
671 in Communication Research. *Human Communication Research*.
- 672 **Li H. 2013.** Aligning sequence reads, clone sequences and assembly contigs with BWA-MEM.  
673 *arXiv [q-bio.GN]*.
- 674 **Li M, An H, Angelovici R, Bagaza C, Batushansky A, Clark L, Coneva V, Donoghue MJ,  
675 Edwards E, Fajardo D, et al. 2018.** Topological Data Analysis as a Morphometric Method:  
676 Using Persistent Homology to Demarcate a Leaf Morphospace. *Frontiers in plant science*.
- 677 **Li H, Handsaker B, Wysoker A, Fennell T, Ruan J, Homer N, Marth G, Abecasis G,  
678 Durbin R. 2009.** The Sequence Alignment/Map format and SAMtools. *Bioinformatics* **25**:  
679 2078–2079.
- 680 **Liu S, Zainuddin IM, Vanderschuren H, Doughty J, Beeching JR. 2017.** RNAi inhibition of  
681 feruloyl CoA 6'-hydroxylase reduces scopoletin biosynthesis and post-harvest physiological  
682 deterioration in cassava (*Manihot esculenta* Crantz) storage roots. *Plant molecular biology* **94**:  
683 185–195.
- 684 **Mangiafico SS. 2018.** rcompanion: Functions to Support Extension Education Program  
685 Evaluation, R package version 2.0.0. <https://CRAN.R-project.org/package=rcompanion>.
- 686 **McDonald PG, Fonseca CR, Overton JM, Westoby M. 2003.** Leaf-size divergence along  
687 rainfall and soil-nutrient gradients: is the method of size reduction common among clades?  
688 *Functional ecology* **17**: 50–57.
- 689 **McLellan T. 2000.** Geographic variation and plasticity of leaf shape and size in *Begonia dregei*  
690 and *B. homonyma* (Begoniaceae). *Botanical journal of the Linnean Society. Linnean Society of*  
691 *London*.
- 692 **Migicovsky Z, Li M, Chitwood DH, Myles S. 2017.** Morphometrics Reveals Complex and  
693 Heritable Apple Leaf Shapes. *Frontiers in plant science* **8**: 2185.
- 694 **Nakayama H, Nakayama N, Seiki S, Kojima M, Sakakibara H, Sinha N, Kimura S. 2014.**  
695 Regulation of the KNOX-GA Gene Module Induces Heterophyllic Alteration in North American  
696 Lake Cress. *The Plant Cell Online*.
- 697 **Navarro D. 2013.** *Learning statistics with R: A tutorial for psychology students and other*  
698 *beginners*.
- 699 **Nicotra AB, Leigh A, Boyce CK, Jones CS, Niklas KJ, Royer DL, Tsukaya H. 2011.** The  
700 evolution and functional significance of leaf shape in the angiosperms. *Functional Plant Biology*.
- 701 **Peppe DJ, Royer DL, Cariglino B, Oliver SY, Newman S, Leight E, Enikolopov G,  
702 Fernandez-Burgos M, Herrera F, Adams JM, et al. 2011.** Sensitivity of leaf size and shape to  
703 climate: global patterns and paleoclimatic applications. *The New phytologist* **190**: 724–739.

- 704 **Piazza P, Bailey CD, Cartolano M, Krieger J, Cao J, Ossowski S, Schneeberger K, He F, De**  
705 **Meaux J, Hall N, et al. 2010.** Arabidopsis thaliana leaf form evolved via loss of KNOX  
706 expression in leaves in association with a selective sweep. *Current biology: CB*.
- 707 **Robinson MD, McCarthy DJ, Smyth GK. 2010.** edgeR: a Bioconductor package for  
708 differential expression analysis of digital gene expression data. *Bioinformatics* **26**: 139–140.
- 709 **Rosero A, Granda L, Pérez J-L, Rosero D, Burgos-Paz W, Martínez R, Morelo J, Pastrana**  
710 **I, Burbano E, Morales A. 2019.** Morphometric and colourimetric tools to dissect morphological  
711 diversity: an application in sweet potato [Ipomoea batatas (L.) Lam.]. *Genetic resources and*  
712 *crop evolution*.
- 713 **Rowland SD, Zumstein K, Nakayama H, Cheng Z, Flores AM, Chitwood DH, Maloof JN,**  
714 **Sinha NR. 2019.** Leaf shape is a predictor of fruit quality and cultivar performance in tomato.  
715 *bioRxiv*: 584466.
- 716 **Royer DL. 2012.** Leaf shape responds to temperature but not CO<sub>2</sub> in *Acer rubrum*. *PloS one* **7**:  
717 e49559.
- 718 **Royer DL, Meyerson LA, Robertson KM, Adams JM. 2009.** Phenotypic plasticity of leaf  
719 shape along a temperature gradient in *Acer rubrum*. *PloS one*.
- 720 **Royer DL, Wilf P, Janesko DA, Kowalski EA, Dilcher DL. 2005.** Correlations of climate and  
721 plant ecology to leaf size and shape: potential proxies for the fossil record. *American journal of*  
722 *botany* **92**: 1141–1151.
- 723 **Shi P, Liu M, Yu X, Gielis J, Ratkowsky DA. 2019.** Proportional Relationship between Leaf  
724 Area and the Product of Leaf Length and Width of Four Types of Special Leaf Shapes. *Forests,*  
725 *Trees and Livelihoods* **10**: 178.
- 726 **Sicard A, Thamm A, Marona C, Lee YW, Wahl V, Stinchcombe JR, Wright SI, Kappel C,**  
727 **Lenhard M. 2014.** Repeated evolutionary changes of leaf morphology caused by mutations to a  
728 homeobox gene. *Current biology: CB*.
- 729 **Simão FA, Waterhouse RM, Ioannidis P, Kriventseva EV, Zdobnov EM. 2015.** BUSCO:  
730 Assessing genome assembly and annotation completeness with single-copy orthologs.  
731 *Bioinformatics* **31**: 3210–3212.
- 732 **Viscosi V. 2015.** Geometric morphometrics and leaf phenotypic plasticity: Assessing fluctuating  
733 asymmetry and allometry in European white oaks (*Quercus*). *Botanical journal of the Linnean*  
734 *Society. Linnean Society of London*.
- 735 **Vlad D, Kierzkowski D, Rast MI, Vuolo F, Dello Ioio R, Galinha C, Gan X, Hajheidari M,**  
736 **Hay A, Smith RS, et al. 2014.** Leaf shape evolution through duplication, regulatory  
737 diversification and loss of a homeobox gene. *Science* **343**: 780–783.
- 738 **Vogel S. 1968.** ‘Sun Leaves’ and ‘Shade Leaves’: Differences in Convective Heat Dissipation.  
739 *Ecology* **49**: 1203–1204.

- 740 **Vuolo F, Mentink RA, Hajheidari M, Bailey CD, Filatov DA, Tsiantis M. 2016.** Coupled  
741 enhancer and coding sequence evolution of a homeobox gene shaped leaf diversity. *Genes and*  
742 *Development* **30**: 2370–2376.
- 743 **Wadl PA, Olukolu BA, Branham SE, Jarret RL, Yencho GC, Jackson DM. 2018.** Genetic  
744 Diversity and Population Structure of the USDA Sweetpotato (*Ipomoea batatas*) Germplasm  
745 Collections Using GBSpoly. *Frontiers in plant science* **9**: 1166.
- 746 **Wang Y, Ghaffari N, Johnson CD, Braga-Neto UM, Wang H, Chen R, Zhou H. 2011.**  
747 Evaluation of the coverage and depth of transcriptome by RNA-Seq in chickens. *BMC*  
748 *bioinformatics* **12 Suppl 10**: S5.
- 749 **Wolfe J a. 1978.** A paleobotanical interpretation of Tertiary climates in the Northern  
750 Hemisphere. *American scientist*.
- 751 **Wyatt R, Antonovics J. 1981.** Butterflyweed Re-Revisited : Spatial and Temporal Patterns of  
752 Leaf Shape Variation in *Asclepias tuberosa*. *Evolution* **1**.
- 753 **Yeh KW, Chen JC, Lin MI, Chen YM, Lin CY. 1997.** Functional activity of sporamin from  
754 sweet potato (*Ipomoea batatas* Lam.): a tuber storage protein with trypsin inhibitory activity.  
755 *Plant molecular biology* **33**: 565–570.
- 756 **Zhang K, Wu Z, Tang D, Luo K, Lu H, Liu Y, Dong J, Wang X, Lv C, Wang J, et al. 2017.**  
757 Comparative Transcriptome Analysis Reveals Critical Function of Sucrose Metabolism Related-  
758 Enzymes in Starch Accumulation in the Storage Root of Sweet Potato. *Frontiers in plant science*  
759 **8**: 914.
- 760 **Zwieniecki MA, Boyce CK, Holbrook NM. 2004.** Hydraulic limitations imposed by crown  
761 placement determine final size and shape of *Quercus rubra* L. leaves. *Plant, cell & environment*  
762 **27**: 357–365
- 763
- 764
- 765
- 766
- 767
- 768
- 769
- 770
- 771
- 772

773 **Table 1** Leaf shape trait values across the 57 chosen sweetpotato accessions. SD represents  
774 standard deviation while PCV represents phenotypic coefficient of variation.

| <b>Trait</b> | <b>Range</b> | <b>Mean</b> | <b>SD</b> | <b>PCV (%)</b> |
|--------------|--------------|-------------|-----------|----------------|
| Circularity  | 0.09-0.71    | 0.50        | 0.12      | 22.61          |
| Aspect Ratio | 1.03-1.26    | 1.10        | 0.05      | 4.76           |
| Solidity     | 0.44-0.95    | 0.84        | 0.10      | 11.85          |

775  
776  
777  
778  
779  
780  
781  
782  
  
783  
  
784  
  
785  
  
786  
  
787  
  
788  
  
789  
  
790  
  
791  
  
792  
  
793  
  
794  
  
795  
  
796  
  
797

798 **Table 2** Sequence statistics of the reference transcriptome obtained from EvidentialGene  
799 pipeline.

| Number of transcripts | Min Len (nt) | Max Len (nt) | Number of bases | Mean Len (nt) | ORF percent | n50 (nt) | % reads mapped |
|-----------------------|--------------|--------------|-----------------|---------------|-------------|----------|----------------|
| 33,684                | 200          | 16,428       | 35,769,411      | 1,062         | 79.95%      | 1,608    | 77%            |

800  
801  
802  
803  
804  
805  
806  
807  
808  
809  
810  
811  
812  
813  
814  
815  
816  
817  
818  
819  
820  
821  
822  
823  
  
824  
825  
826  
827  
828  
829  
830  
831  
832  
833  
834



835 **Table 3** Candidate genes maintaining variation in leaf traits (circularity, AR and symPCs)  
 836 identified from the set of differentially expressed transcripts (DETs) in *Ipomoea batatas*.  
 837

| Transcript ID       | LogFC | FDR   | Gene Description                               |
|---------------------|-------|-------|------------------------------------------------|
| <b>Circularity</b>  |       |       |                                                |
| trn22514            | 5.77  | 0.003 | FAR1-RELATED SEQUENCE                          |
| trn27202            | 2.08  | 0.021 | Exocyst complex component EXO70A1              |
| trn24081            | 1.33  | 0.033 | Extra-large guanine nucleotide-binding protein |
| <b>Aspect Ratio</b> |       |       |                                                |
| trn9778             | -2.95 | 0.035 | Chalcone Synthase (CHS)                        |
| trn24267            | 2.55  | 0.00  | Feruloyl CoA 6'-hydroxylase 2                  |
| trn25053            | -1.85 | 0.021 | Protein LIGHT-DEPENDENT SHORT HYPOCOTYLS 10    |
| <b>symPC1</b>       |       |       |                                                |
| trn27227            | 1.56  | 0.018 | Homeobox-leucine zipper HAT22                  |
| trn23566            | 3.54  | 0.00  | FAR1-RELATED SEQUENCE 7                        |
| <b>symPC2</b>       |       |       |                                                |
| trn27049            | -3.09 | 0.009 | Chalcone Synthase                              |
| trn28352            | -3.52 | 0.00  | Chalcone Synthase                              |
| trn9093             | -2.21 | 0.00  | Sporamin B                                     |

838  
 839  
 840  
 841  
 842  
 843  
 844  
 845

846 **Table 4** ANOVA table of the leaf shape traits model showing significant explanatory variables.  
 847 df: degrees of freedom; *F*: value of F-statistic; *P*: p-value;  $\eta^2$ : eta-squared value.

| Variable  | df  | Circularity |          |              | Aspect Ratio |          |              | Solidity |           |              |
|-----------|-----|-------------|----------|--------------|--------------|----------|--------------|----------|-----------|--------------|
|           |     | <i>F</i>    | <i>P</i> | $\eta^2$ (%) | <i>F</i>     | <i>P</i> | $\eta^2$ (%) | <i>F</i> | <i>P</i>  | $\eta^2$ (%) |
| Accession | 73  | 18.06       | <0.001** | 73.23        | 4.22         | <0.001** | 38.40        | 21.09    | <0.001*** | 77.18        |
| Garden    | 1   | 3.64        | 0.056    | 0.20         | 15.5         | <0.001** | 1.93         | 3.37     | 0.067     | 0.16         |
| Block     | 8   | 3.01        | 0.002**  | 1.33         | 1.38         | 0.020    | 1.38         | 1.94     | 0.052     | 0.70         |
| GxE       | 69  | 1.30        | 0.06     | 5.01         | 1.50         | 0.009**  | 12.95        | 1.30     | 0.065     | 0.40         |
| Residuals | 364 | NA          | NA       | 20.2         | NA           | NA       | 45.31        | NA       | NA        | 17.56        |

848  
 849  
 850  
 851  
 852  
 853  
 854  
 855  
 856  
 857  
  
 858  
 859  
 860  
 861  
 862  
 863  
 864

865 **Table 5** Broad-sense heritability values for leaf shape traits in differing environments.

| Env | $H^2$       |              |          |        |        |        |        |
|-----|-------------|--------------|----------|--------|--------|--------|--------|
|     | Circularity | Aspect Ratio | Solidity | symPC1 | symPC2 | symPC3 | symPC4 |
| MI  | 0.79        | 0.39         | 0.82     | 0.80   | 0.58   | 0.70   | 0.69   |
| OH  | 0.73        | 0.26         | 0.76     | 0.59   | 0.67   | 0.63   | 0.47   |

866 \* Note: We can not compare heritability values for EFD symPCs between MI and OH because  
867 the expression of traits vary between environments, and hence what the symPCs capture differs  
868 between the two environments.

869  
870  
871  
872

873

874

875

876

877

878

879

880

881

882

883

884

885

886

887

888

889

890

891 **Supporting Information**

892 **Method S1** RNA-Seq data processing and transcriptome analysis.

893 **Fig. S1** Green-house grown accessions selected for transcriptomic analysis.

894 **Fig. S2** Correlation plot between leaf shape traits (traditional and EFD PCs).

895 **Fig. S3** Leaf shape variation captured by EFDs from MI and OH differing significantly in their  
896 order of variation explained.

897 **Table S1** Accession IDs with their source and location of origin used in this study.

898 **Table S2** Differentially expressed transcripts associated with leaf shape traits found in this study.

899 **Table S3** Raw read counts of orthologs of homeobox domain genes within the assembled  
900 transcriptomes, for accessions chosen for circularity RNA-Seq analysis.

901

902

903
